# Supplementary material
Source: MDPI journal article supplement (https://www.mdpi.com/2071-1050/12/22/9694)
Supplement: s1 [file s1]

Table 1: Classification by size

| SIZE                           |     |
|--------------------------------|-----|
| NO EMPLOYEES                   | 48  |
| FROM ONE TO FOUR PEOPLE        | 827 |
| FIVE TO NINE PEOPLE            | 66  |
| FROM TEN TO TWENTY-FOUR PEOPLE | 24  |
| FROM 25 TO 50 PEOPLE           | 8   |
| FROM 51 TO 100 PEOPLE          | 7   |
| MORE OF 100 PEOPLE             | 0   |
| TOTAL                          | 980 |

Table 2: Classification by activities

| ACTIVITIES                                                                                            |     |
|-------------------------------------------------------------------------------------------------------|-----|
| SALE OF ALL KINDS OF PARTS, COMPONENTS, SUPPLIES, TOOLS AND ACCESSORIES FOR CYCLES AND MOTOR VEHICLES | 63  |
| WHOLESALE AND RETAIL OF TECHNOLOGY, STATIONERY AND OFFICE SUPPLIES                                    | 157 |
| WHOLESALE AND RETAIL SALE IN GENERAL BAZAAR, PERFUMERY, COSTUME JEWELERY, CLOTHING AND FUR.           | 266 |
| WHOLESALE AND RETAIL OF FOOD AND AGRICULTURAL PRODUCTS                                                | 341 |
| WHOLESALE AND RETAIL SALES OF FOOTWEAR AND SHOEMAKING EQUIPMENT.                                      | 61  |
| OTHERS (THEY MAKE AND SELL EVERYTHING).                                                               | 92  |
| TOTAL                                                                                                 | 980 |

Table 3: Survey

|                                                                                                   |
|---------------------------------------------------------------------------------------------------|
| <b>Indicate the degree of agree and disagree with the following considerations</b>                |
|                                                                                                   |
| In all areas there is a continuous concern for the quality of the product or service              |
| Your company is constantly looking for information on new technologies that it can apply          |
| Informatics provides the appropriate information to make decisions at managerial levels           |
| There is a continuous concern to avoid pollution and improve the environment                      |
| The continuous technological improvement of the company helps to generate value                   |
| You have a high degree of trust between the people of the company                                 |
|                                                                                                   |
| <b>Indicate if your company increase or decrease in the las two years in the following issues</b> |
|                                                                                                   |
| Billing                                                                                           |
| The Net Profit                                                                                    |
| Solvency                                                                                          |
| Productivity                                                                                      |
| Modernization of facilities and equipment                                                         |
| The capacity for innovation                                                                       |
| The use of new technologies                                                                       |
|                                                                                                   |
| <b>Description of the company</b>                                                                 |
| Size of the company                                                                               |
| Economic activity                                                                                 |
| Year of foundation                                                                                |
